# Supplementary material for: Rapid, self-sacrificing template synthesis of two dimensional high-entropy oxides toward high-performance oxygen evolution
Source: Royal Society of Chemistry journal article supplement (doi:10.1039/d3ta06679g), 2024-01-01
Supplement: d3ta06679g1.pdf [file d3ta06679g1.pdf]

## Supporting Information

### **Rapid, self-sacrificing template synthesis of two dimension high-entropy oxides toward high-performance oxygen evolution**

*Xiaofeng Tian<sup>a</sup>, Hongdong Li<sup>a\*</sup>, Rui Chang<sup>a</sup>, Yu Yang<sup>a</sup>, Zhenhui Wang<sup>a</sup>, Tian Dong<sup>a</sup>, Jianping Lai<sup>a</sup>, Shouhua Feng<sup>a</sup> and Lei Wang<sup>a,b\*</sup>*

<sup>a</sup>Key Laboratory of Eco-Chemical Engineering, International Science and Technology Cooperation Base of Eco-Chemical Engineering and Green Manufacturing, College of Chemistry and Molecular Engineering, Qingdao University of Science and Technology, Qingdao 266042, P. R. China

<sup>b</sup> Shandong Engineering Research Center for Marine Environment Corrosion and Safety Protection, College of Environment and Safety Engineering, Qingdao University of Science and Technology, Qingdao 266042, P. R. China

E-mail: lihd@qust.edu.cn; inorchemwl@126.com

## Experimental Section

**Chemicals:**  $\text{Fe}(\text{NO}_3)_3 \cdot 9\text{H}_2\text{O}$ ,  $\text{Ni}(\text{NO}_3)_2 \cdot 6\text{H}_2\text{O}$ ,  $\text{Cr}(\text{NO}_3)_3 \cdot 9\text{H}_2\text{O}$ ,  $\text{RuCl}_3$  were obtained from Aladdin.  $\text{Co}(\text{NO}_3)_3 \cdot 6\text{H}_2\text{O}$  was procured from Macklin.  $\text{Mn}(\text{NO}_3)_2 \cdot 4\text{H}_2\text{O}$ ,  $\text{Mo}(\text{CO})_6$  were purchased from Sigma-Aldrich. Potassium hydroxide (KOH, 90%) was bought from Aladdin. Nafion solution (5%) was acquired from Sigma-Aldrich. The deionized water in the experiment is ultrapure water ( $18.2 \text{ M}\Omega \cdot \text{cm}$ ).

**Synthesis of high-entropy oxides:**  $\text{Fe}(\text{NO}_3)_3 \cdot 9\text{H}_2\text{O}$  (0.41 g),  $\text{Co}(\text{NO}_3)_3 \cdot 6\text{H}_2\text{O}$  (0.29 g),  $\text{Ni}(\text{NO}_3)_2 \cdot 6\text{H}_2\text{O}$  (0.30 g),  $\text{Mo}(\text{CO})_6$  (0.26 g),  $\text{RuCl}_3$  (0.21 g) (0.1 mmol each) was poured into a mortar and ground evenly, then add 1 g cellulose powder and grind again until completely mixed, thus obtaining the precursor. The obtained precursor powder was placed in a container and heated in a Joule heating device at 150 A for 60 seconds and then 240 A for 60 seconds, and cooled and taken out after the reaction was finished. Similarly,  $(\text{FeCoNiCrMn})_3\text{O}_4$ ,  $(\text{FeCoNiMoMn})_3\text{O}_4$ ,  $(\text{FeCoNiMn})_3\text{O}_4$  and  $(\text{FeCoNi})_3\text{O}_4$  are synthesized, except that the type of metal salt is changed. (Replace metal salts with  $\text{Cr}(\text{NO}_3)_3 \cdot 9\text{H}_2\text{O}$ ,  $\text{Mn}(\text{NO}_3)_2 \cdot 4\text{H}_2\text{O}$  and  $\text{Mo}(\text{CO})_6$ ).

**Materials characterization:** The morphologies of materials were characterized by scanning electron microscope (SEM, Hitachi Regulus 8100), transmission electron microscopy (TEM) and high resolution TEM (HRTEM) (JEM-2100UHR at an accelerating voltage of 200 KV). Powder X-ray diffraction (XRD) spectra were recorded on an X'Pert-Pro MPD diffractometer (Netherlands PANalytical) operating at 40 KV and 40 mA with  $\text{Cu K}\alpha$  radiation. X-ray photoelectron spectrum (XPS) was conducted using VG ESCALABMK II spectrometer with  $\text{Al K}\alpha$  photon source.

Electrochemical FT-IR reflection spectroscopy was investigated on a Fourier transform infrared spectrometer (Thermo iS50 FT-IR).

**Electrochemical measurements:** The different catalysts were dispersed in isopropanol + ultrapure water + Nafion (v:v:v = 3:1:0.04) and sonicated for 30 min yielding highly dispersed suspensions with a concentration of 10 mg mL<sup>-1</sup>. Then, 25  $\mu$ L of the catalyst ink was dropped onto a clean carbon paper substrate. After drying at room temperature, the catalyst was loaded with approximately 0.50 mg cm<sup>-2</sup>. Electrochemical measurements were conducted on a CHI 760 electrochemical workstation (Shanghai Chenhua Instrument Co., Ltd.). The electrochemical tests were carried out in a conventional three-electrode cell, Carbon paper was used as the working electrode, the graphite rod electrode as the counter electrode and a saturated calomel electrode (SCE) as the reference electrode. The potentials were calibrated to RHE:  $E(\text{RHE}) = E(\text{SCE}) + 0.241 \text{ V} + 0.0592 \times \text{pH}$ . All tests were compensated with 95% ohmic potential drop (IR). OER measurements were performed in 1 M KOH solution. The stability of samples was performed through 20000 CV cycles and chronoamperometry (i-t curve) test. Electrochemical impedance spectroscopy (EIS) measurements were measured at 1.55 V vs. RHE in the frequency range from 100 kHz to 0.1 Hz in 1.0 M KOH solution.

The TOF values were calculated by the following equation. Where,  $j$  is the current density,  $A$  is the geometric area of the working electrode,  $F$  is the Faraday constant and  $N$  is the number of active sites.

$$\text{TOF} = \frac{jA}{2FN}$$

Here, the electrochemically active surface area (ECSA) of the catalysts is evaluated using the electrochemical double layer capacitance (Cdl) method. From the equation

$C_s$  is the specific capacitance. Note that herein the general specific capacitance ( $C_s$ ) in alkaline solution is around  $0.04 \text{ mF cm}^{-2}$ .

$$\text{ECSA} = \frac{Cdl}{C_s}$$

$\rho^{\text{RHE}}$  reflects the dependence of OER reaction kinetics on proton activity, and the formula is as follows:

$$\rho^{\text{RHE}} = \frac{\partial \log(j)}{\partial \text{pH}}$$

Where pH ranges from 12.5 to 14 and  $\log(j)$  is the logarithm of the current density at 1.5 V versus the RHE. The OER kinetics are almost independent of the solution pH. While proton-coupled electron transfer reactions are occurring, the OER kinetics is almost independent of the solution pH, resulting in a low  $\rho^{\text{RHE}}$ . If the OER involves non-co-operative proton-electron transfer, the OER kinetics will be strongly dependent on pH and have a large  $\rho^{\text{RHE}}$  value.

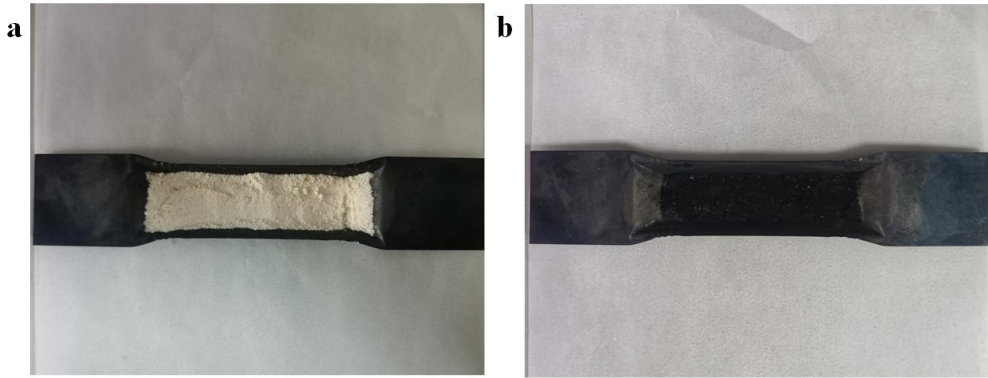

**Figure S1.** (a) Photographs of precursor, (b) Photographs of the synthesized high-entropy oxide via Joule-heating.

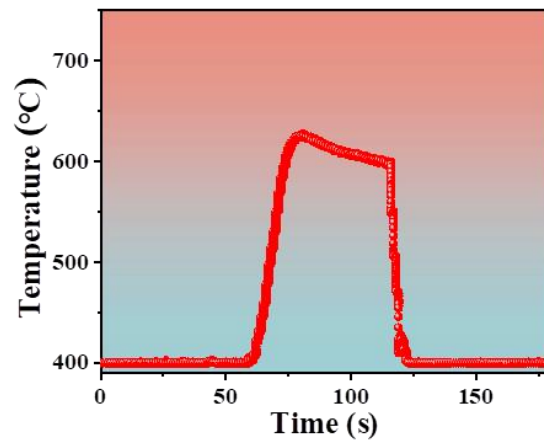

**Figure S2.** Time-temperature evolution during sample preparation.

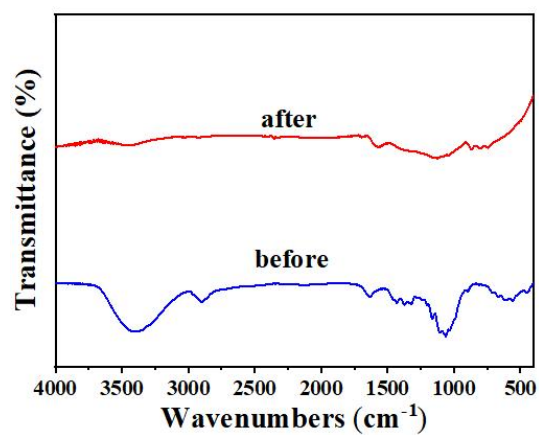

**Figure S3.** Comparison of FT-IR spectra of  $(\text{FeCoNiMoRu})_3\text{O}_4$  before and after Joule heating.

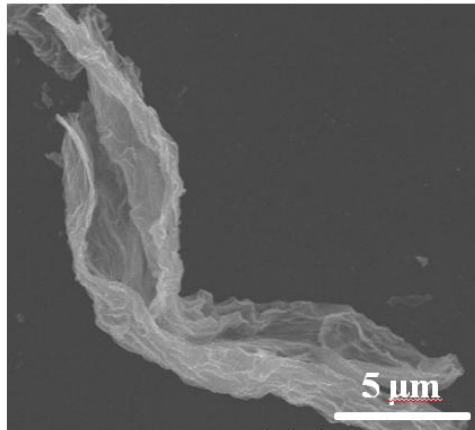

**Figure S4.** SEM image of  $(\text{FeCoNiMoRu})_3\text{O}_4$ .

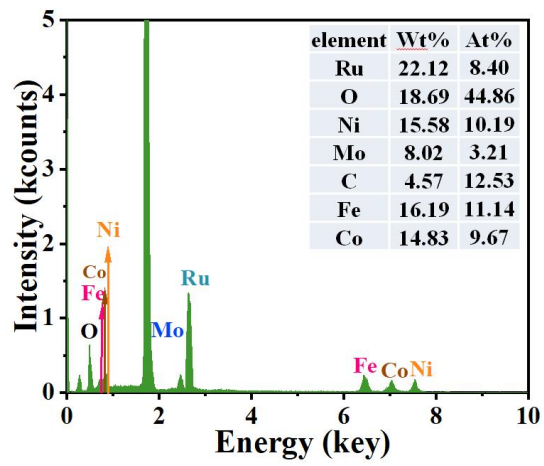

**Figure S5.** TEM-EDS of  $(\text{FeCoNiMoRu})_3\text{O}_4$ .

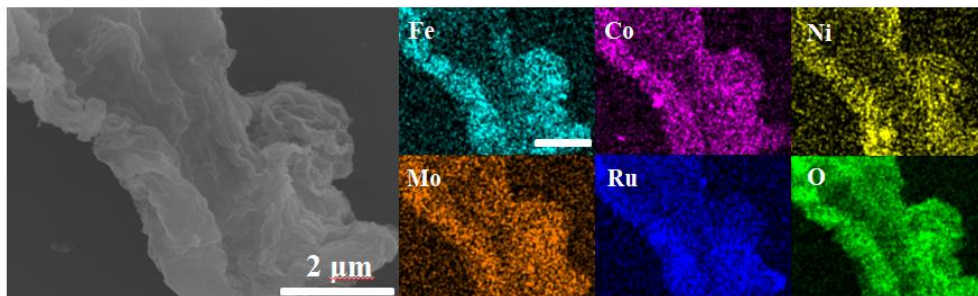

**Figure S6.** SEM-EDS mapping of  $(\text{FeCoNiMoRu})_3\text{O}_4$ .

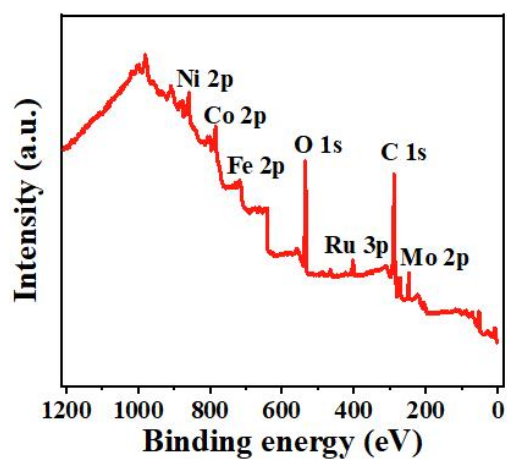

**Figure S7.** The XPS spectra of  $(\text{FeCoNiMoRu})_3\text{O}_4$ .

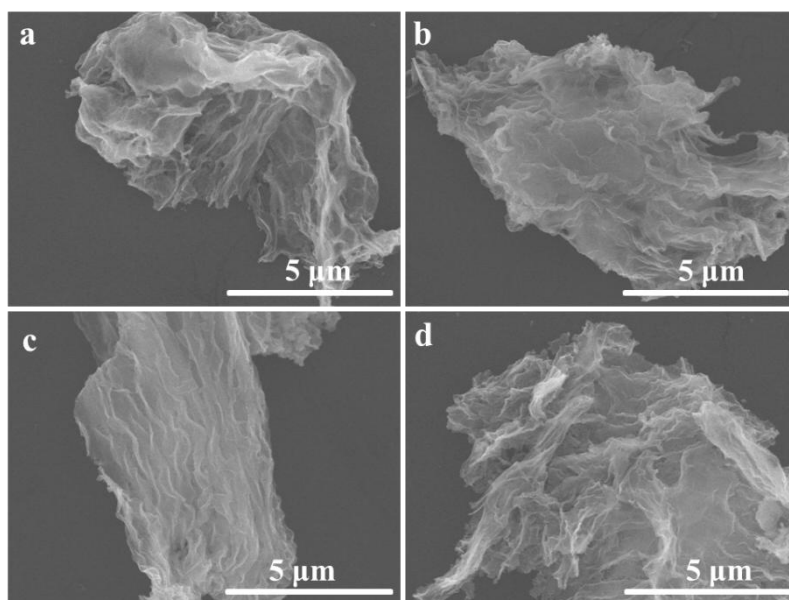

**Figure S8.** SEM images of (a)  $(\text{FeCoNiCrMn})_3\text{O}_4$ , (b)  $(\text{FeCoNiMoMn})_3\text{O}_4$ , (c)  $(\text{FeCoNiMn})_3\text{O}_4$  and (d)  $(\text{FeCoNi})_3\text{O}_4$ .

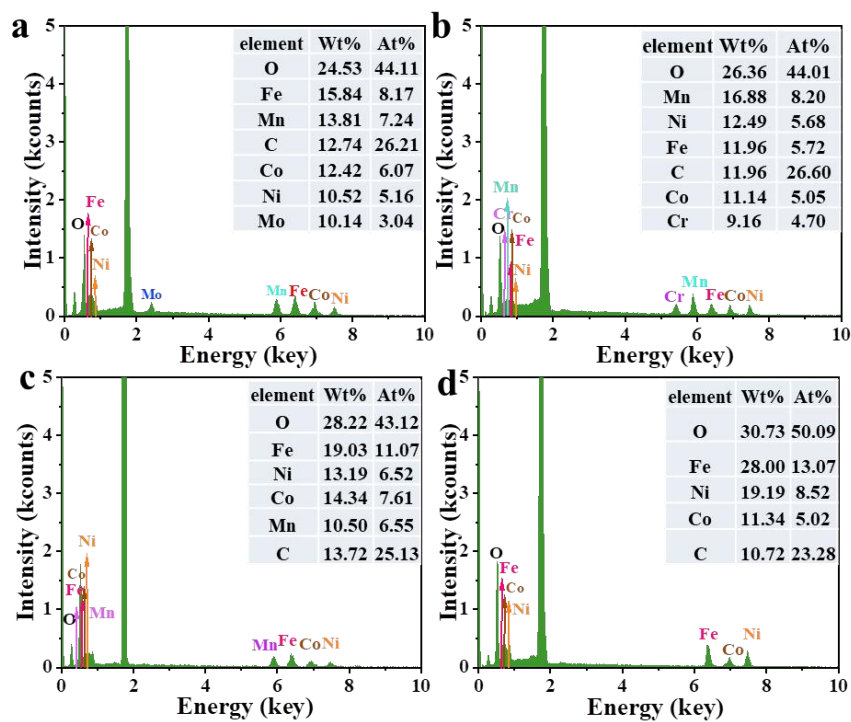

**Figure S9.** SEM-EDS spectra of (a)  $(\text{FeCoNiMoMn})_3\text{O}_4$ , (b)  $(\text{FeCoNiCrMn})_3\text{O}_4$ , (c)  $(\text{FeCoNiMn})_3\text{O}_4$  and (d)  $(\text{FeCoNi})_3\text{O}_4$ .



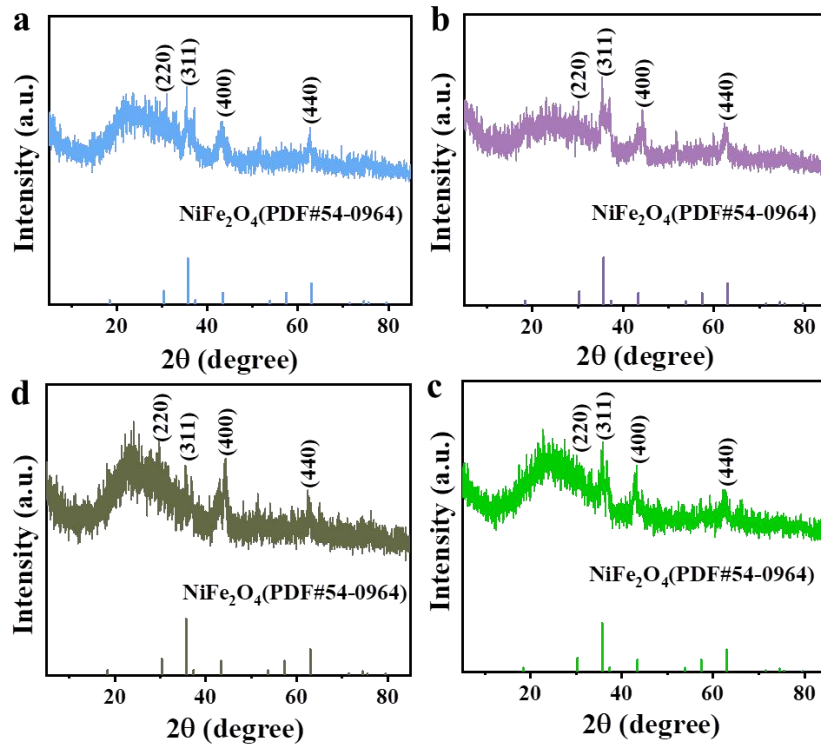

**Figure S10.** XRD patterns of (a)  $(\text{FeCoNiCrMn})_3\text{O}_4$ , (b)  $(\text{FeCoNiMoMn})_3\text{O}_4$ , (c)  $(\text{FeCoNiMn})_3\text{O}_4$  and (d)  $(\text{FeCoNi})_3\text{O}_4$ .

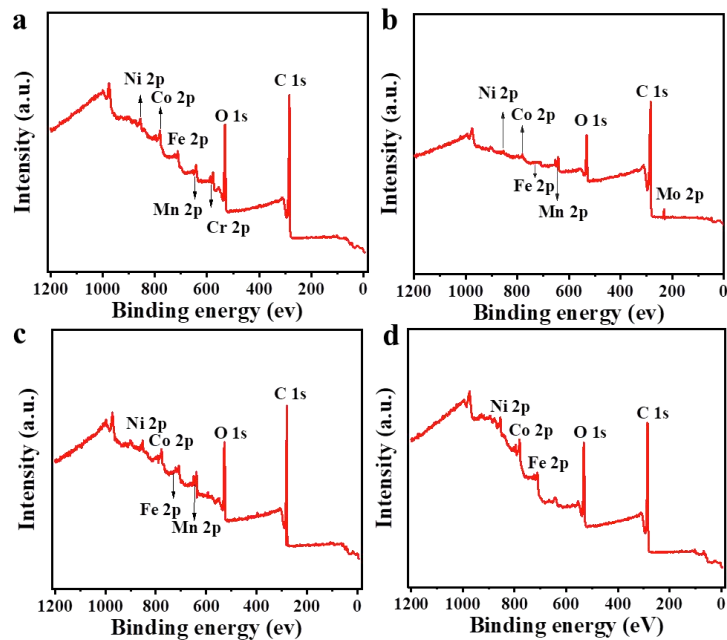

**Figure S11.** The XPS spectra of (a)  $(\text{FeCoNiCrMn})_3\text{O}_4$ , (b)  $(\text{FeCoNiMoMn})_3\text{O}_4$ , (c)  $(\text{FeCoNiMn})_3\text{O}_4$  and (d)  $(\text{FeCoNi})_3\text{O}_4$ .

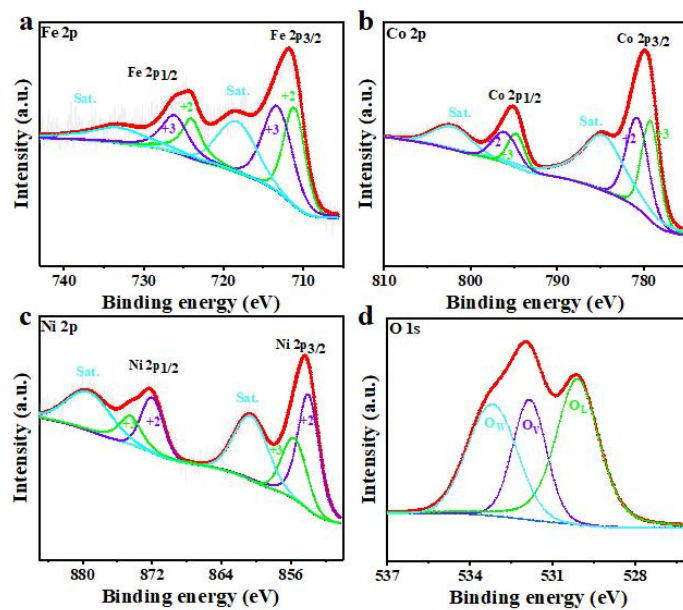

**Figure S12.** High resolution XPS spectra of (a) Fe 2p, (b) Co 2p, (c) Ni 2p, (d) O 1 s in  $(\text{FeCoNi})_3\text{O}_4$ .

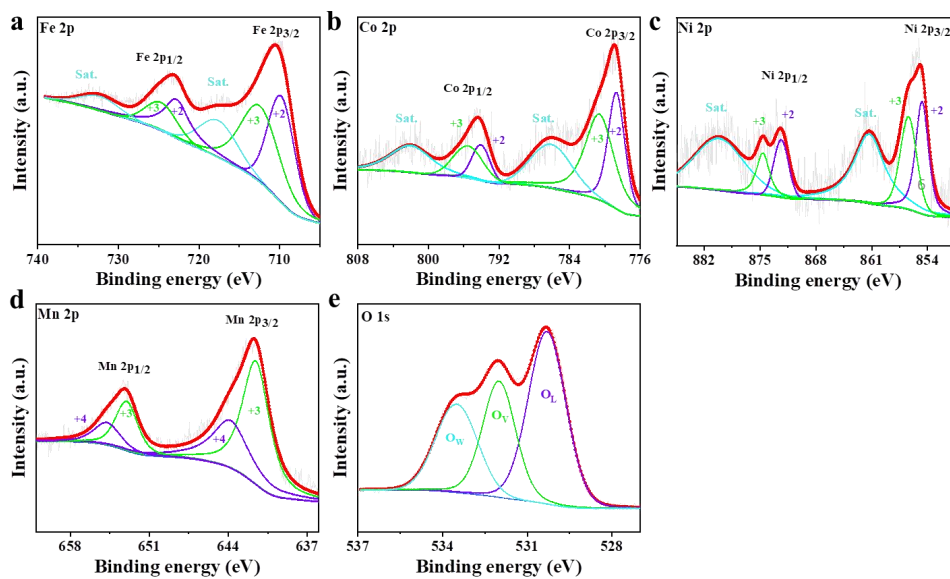

**Figure S13.** High resolution XPS spectra of (a) Fe 2p, (b) Co 2p, (c) Ni 2p, (d) Mn 2p, (e) O 1 s in  $(\text{FeCoNiMn})_3\text{O}_4$ .

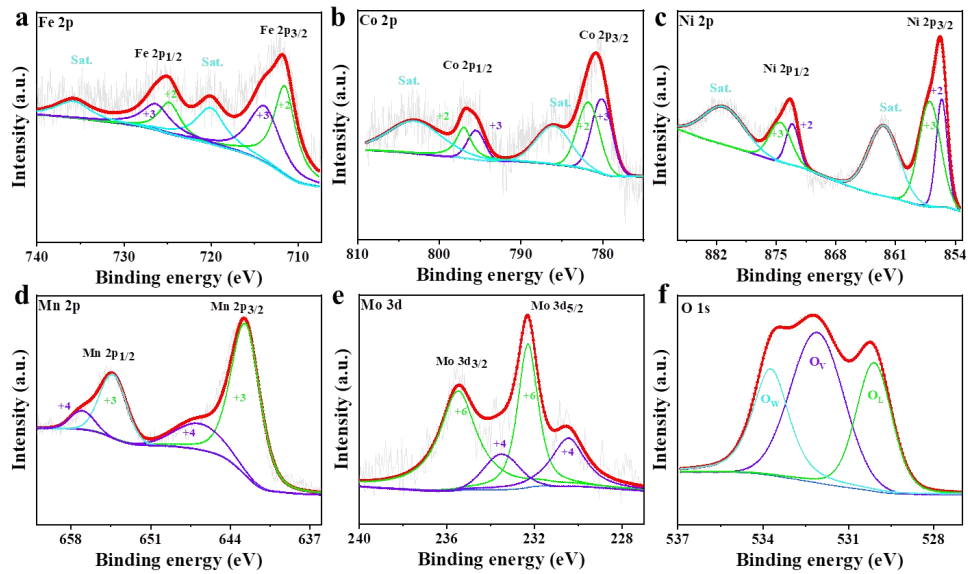

**Figure S14.** High resolution XPS spectra of (a) Fe 2p, (b) Co 2p, (c) Ni 2p, (d) Mn 2p, (e) Mo 3d, (f) O 1 s in  $(\text{FeCoNiMoMn})_3\text{O}_4$ .

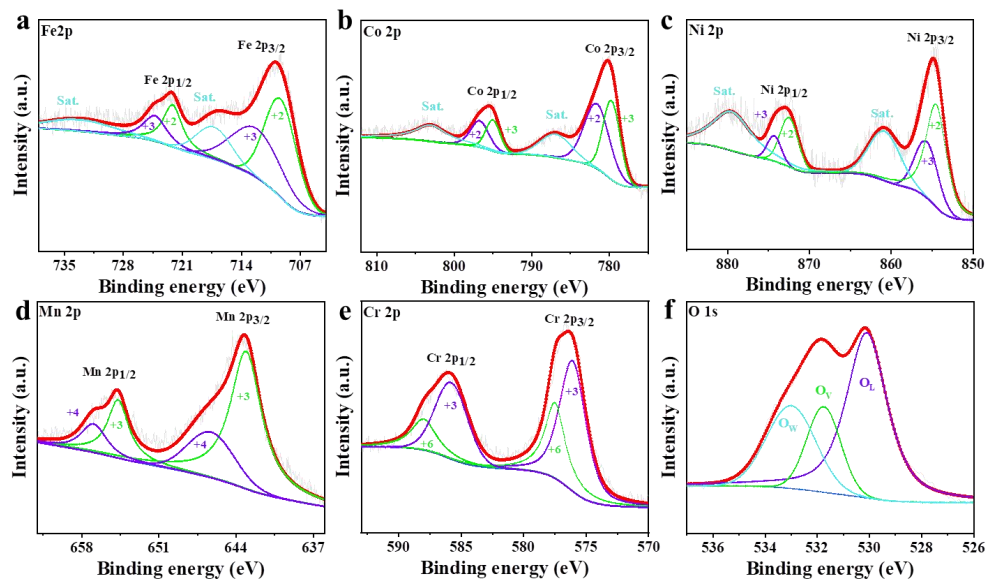

**Figure S15.** High resolution XPS spectra of (a) Fe 2p, (b) Co 2p, (c) Ni 2p, (d) Mn 2p, (e) Cr 2p, (f) O 1 s in  $(\text{FeCoNiCrMn})_3\text{O}_4$ .

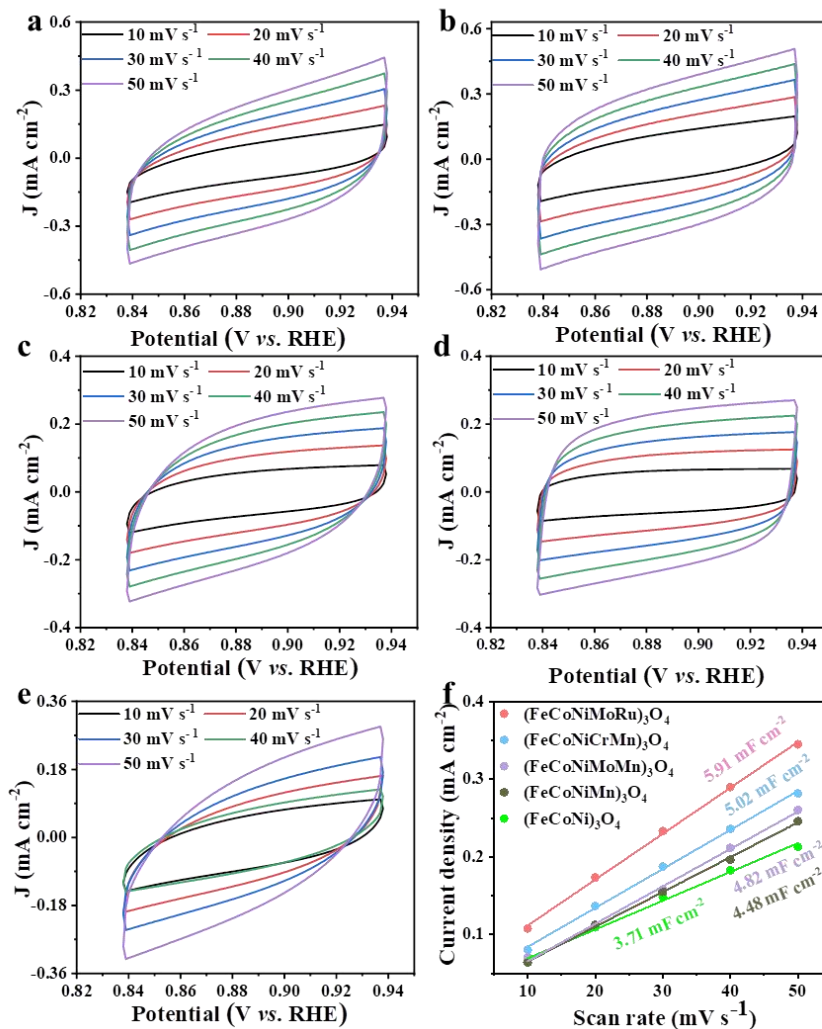

**Figure S16.** CV curves of (a)  $(\text{FeCoNiMoRu})_3\text{O}_4$ , (b)  $(\text{FeCoNiCrMn})_3\text{O}_4$ , (c)  $(\text{FeCoNiMoMn})_3\text{O}_4$ , (d)  $(\text{FeCoNiMn})_3\text{O}_4$ , and (e)  $(\text{FeCoNi})_3\text{O}_4$ , (f) Estimation of  $C_{dl}$  by plotting the capacitive current density against the scan rate to fit a linear regression.

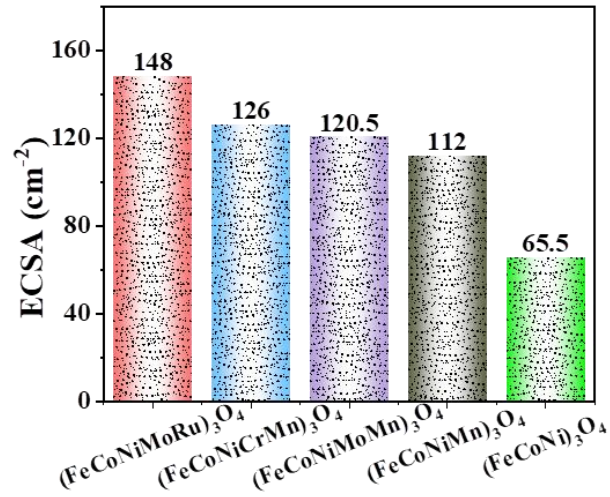

**Figure S17.** ECSA of (FeCoNiMoRu)<sub>3</sub>O<sub>4</sub>, (FeCoNiCrMn)<sub>3</sub>O<sub>4</sub>, (FeCoNiMoMn)<sub>3</sub>O<sub>4</sub>, (FeCoNiMn)<sub>3</sub>O<sub>4</sub>, and (FeCoNi)<sub>3</sub>O<sub>4</sub>.

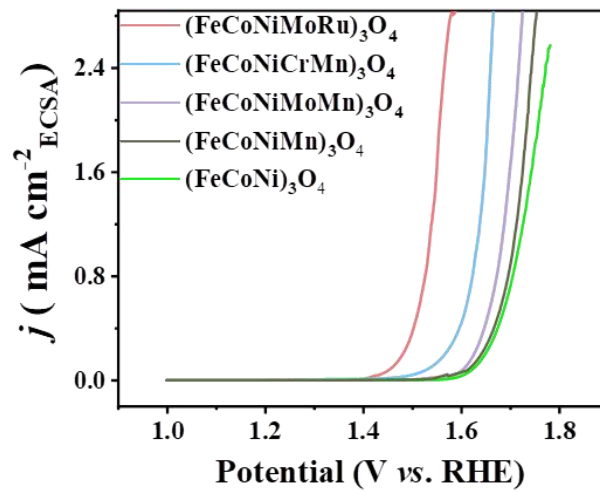

**Figure S18.** ECSA of (FeCoNiMoRu)<sub>3</sub>O<sub>4</sub>, (FeCoNiCrMn)<sub>3</sub>O<sub>4</sub>, (FeCoNiMoMn)<sub>3</sub>O<sub>4</sub>, (FeCoNiMn)<sub>3</sub>O<sub>4</sub>, and (FeCoNi)<sub>3</sub>O<sub>4</sub>.

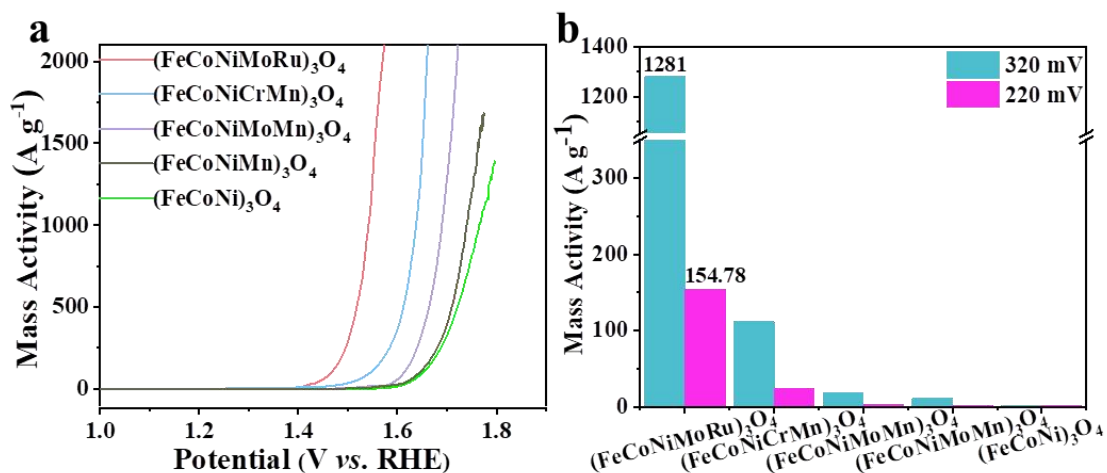

**Figure S19.** (a) Mass activity curves of  $(\text{FeCoNiMoRu})_3\text{O}_4$ ,  $(\text{FeCoNiCrMn})_3\text{O}_4$ ,  $(\text{FeCoNiMoMn})_3\text{O}_4$ ,  $(\text{FeCoNiMn})_3\text{O}_4$  and  $(\text{FeCoNi})_3\text{O}_4$  for OER. (b) Mass activity of  $(\text{FeCoNiMoRu})_3\text{O}_4$ ,  $(\text{FeCoNiCrMn})_3\text{O}_4$ ,  $(\text{FeCoNiMoMn})_3\text{O}_4$ ,  $(\text{FeCoNiMn})_3\text{O}_4$  and  $(\text{FeCoNi})_3\text{O}_4$  at the overpotential of 320 mV and 220 mV. All the five metals are considered.

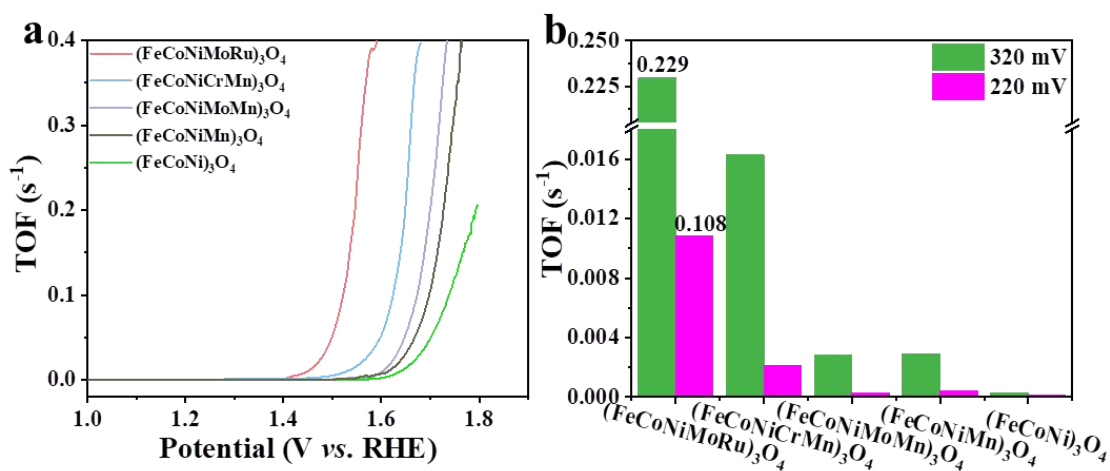

**Figure S20.** (a) The TOF values of  $(\text{FeCoNiMoRu})_3\text{O}_4$ ,  $(\text{FeCoNiCrMn})_3\text{O}_4$ ,  $(\text{FeCoNiMoMn})_3\text{O}_4$ ,  $(\text{FeCoNiMn})_3\text{O}_4$  and  $(\text{FeCoNi})_3\text{O}_4$  for OER. (b) TOF values of  $(\text{FeCoNiMoRu})_3\text{O}_4$ ,  $(\text{FeCoNiCrMn})_3\text{O}_4$ ,  $(\text{FeCoNiMoMn})_3\text{O}_4$ ,  $(\text{FeCoNiMn})_3\text{O}_4$  and  $(\text{FeCoNi})_3\text{O}_4$  at the overpotential of 320 mV and 220 mV. All the five metals are considered.

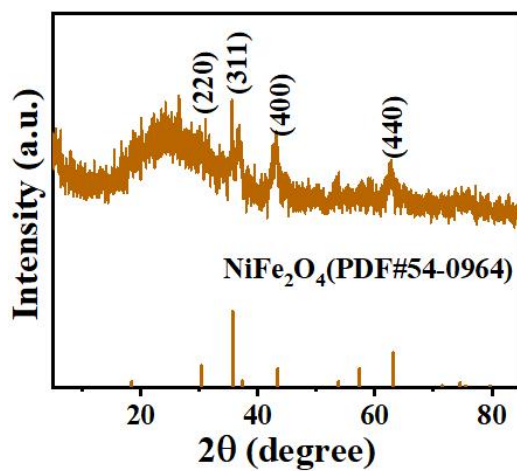

**Figure S21.** XRD pattern of  $(\text{FeCoNiMoRu})_3\text{O}_4$  after OER testing.

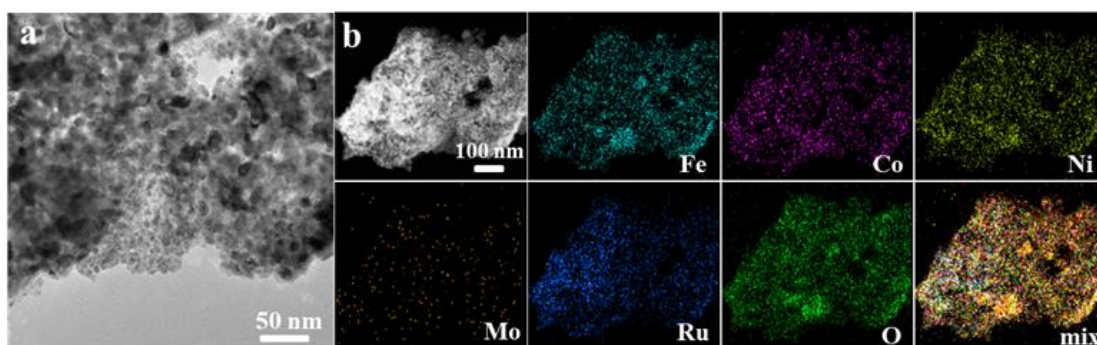

**Figure S22.** TEM image and TEM-EDS mapping of  $(\text{FeCoNiMoRu})_3\text{O}_4$  after OER testing.

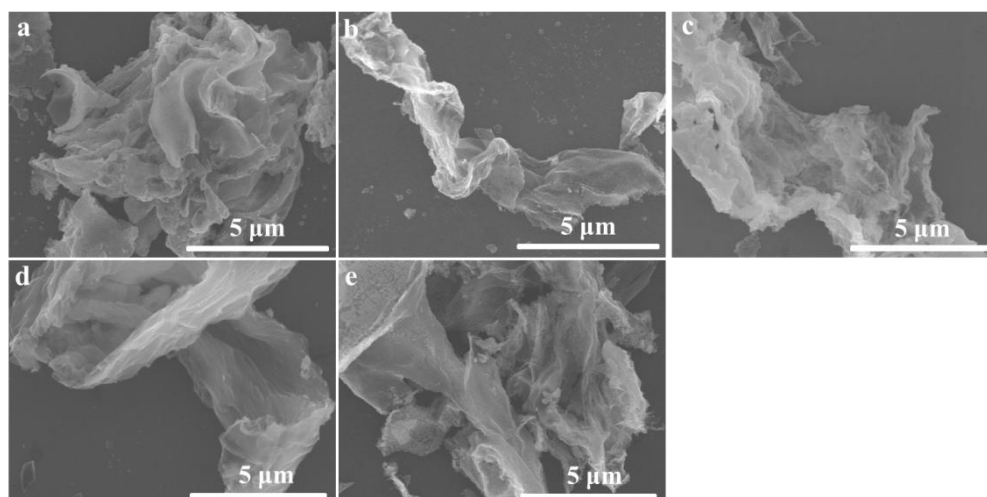

**Figure S23.** SEM images after OER testing. (a)  $(\text{FeCoNiMoRu})_3\text{O}_4$ , (b)  $(\text{FeCoNiCrMn})_3\text{O}_4$ , (c)  $(\text{FeCoNiMoMn})_3\text{O}_4$ , (d)  $(\text{FeCoNiMn})_3\text{O}_4$  and (e)  $(\text{FeCoNi})_3\text{O}_4$ .

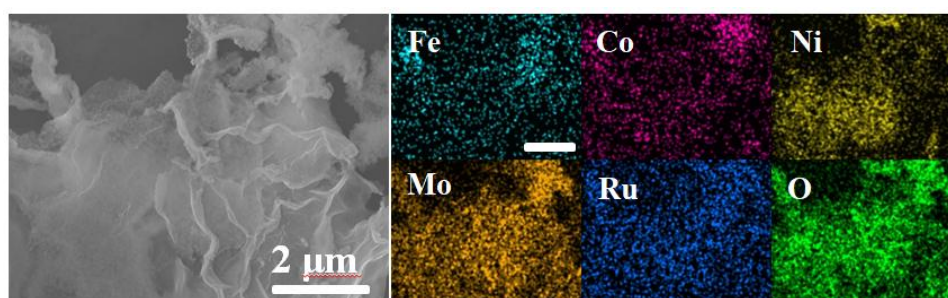

**Figure S24.** SEM-EDS mapping of  $(\text{FeCoNiMoRu})_3\text{O}_4$  after OER testing.



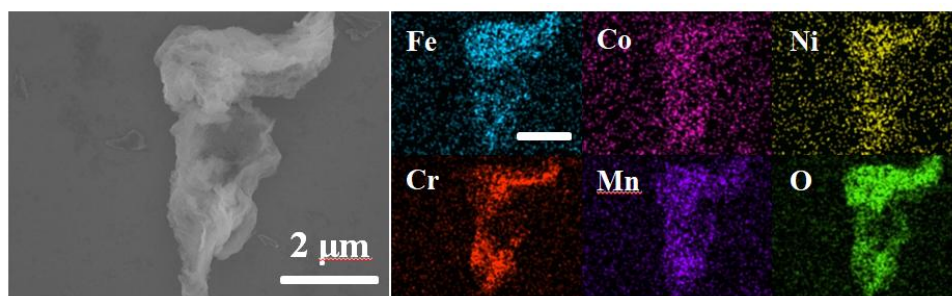

**Figure S25.** SEM-EDS mapping of  $(\text{FeCoNiCrMn})_3\text{O}_4$  after OER testing.

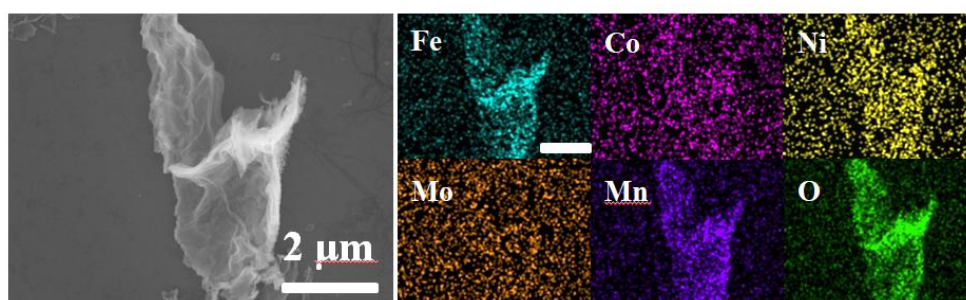

**Figure S26.** SEM-EDS mapping of  $(\text{FeCoNiMoMn})_3\text{O}_4$  after OER testing.

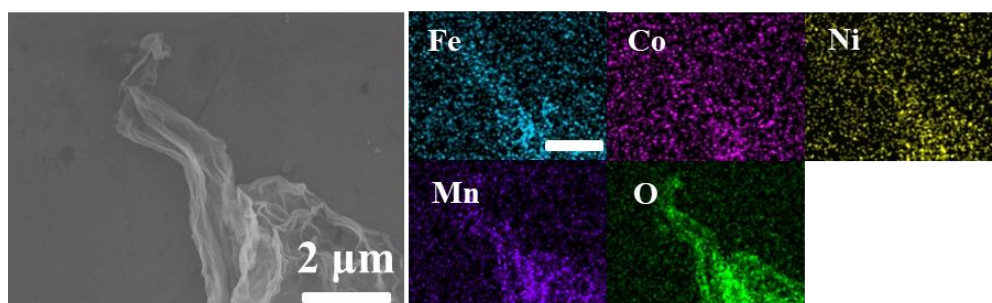

**Figure S27.** SEM-EDS mapping of  $(\text{FeCoNiMn})_3\text{O}_4$  after OER testing.

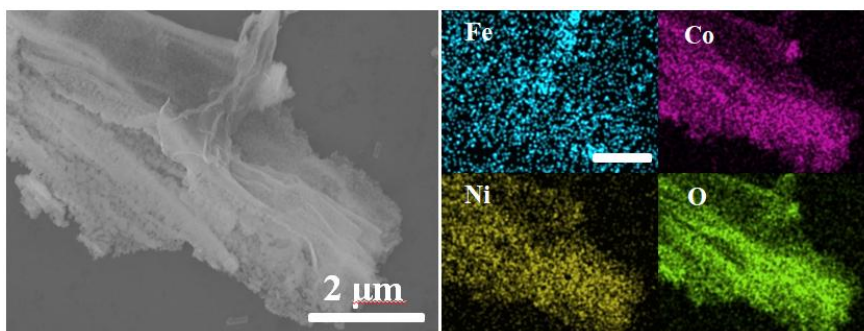

**Figure S28.** SEM-EDS mapping of  $(\text{FeCoNi})_3\text{O}_4$  after OER testing.

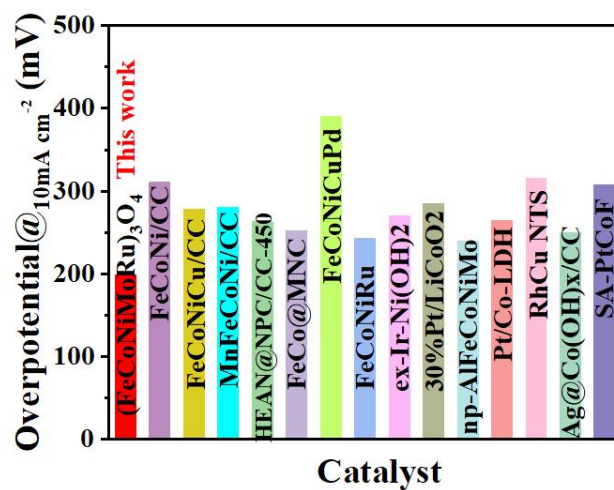

**Figure S29.** Comparison of OER electrocatalytic performance of our as-prepared HEOs with other reported catalysts.

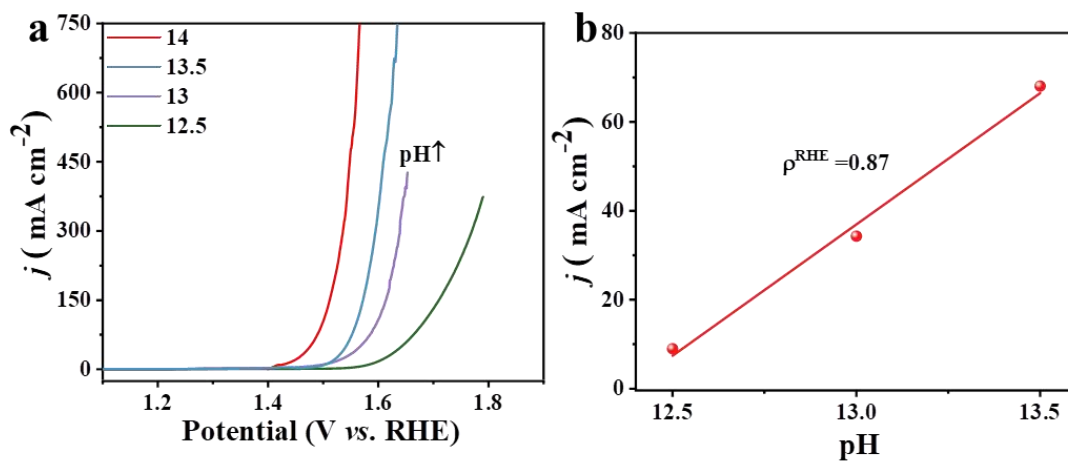

**Figure S30.** (a) The LSV curves of catalyst  $(\text{FeCoNiMoRu})_3\text{O}_4$  is measured in KOH electrolytes with pH = 12.5, 13, 13.5, and 14. (b)  $j$  at 1.5 V vs. RHE plotted in log scale as a function of pH, from which the proton reaction orders ( $\rho^{\text{RHE}} = \partial \log(j) / \partial \text{pH}$ ) were derived.

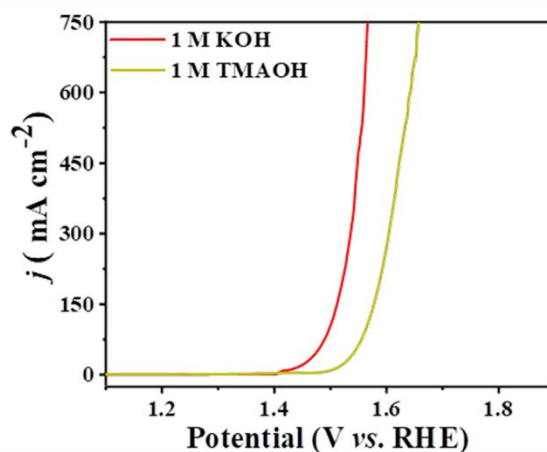

**Figure S31.** The LSV curves of  $(\text{FeCoNiMoRu})_3\text{O}_4$  in different solutions.

**Table S1.** Comparison of OER performance of (FeCoNiMoRu)<sub>3</sub>O<sub>4</sub> and recent reported electrocatalysts at 1 M KOH electrolyte.

| Catalyst                                                                                                                     | Potential (vs. RHE) (at 10 mA cm <sup>-2</sup> ) | Tafel slope (mV dec <sup>-1</sup> ) | References                                  |
|------------------------------------------------------------------------------------------------------------------------------|--------------------------------------------------|-------------------------------------|---------------------------------------------|
| <b>(FeCoNiMoRu)<sub>3</sub>O<sub>4</sub></b>                                                                                 | <b>1.43</b>                                      | <b>40.0</b>                         | <b>This work</b>                            |
| (FeCoNiCrMn) <sub>3</sub> O <sub>4</sub>                                                                                     | 1.49                                             | 57.0                                | This work                                   |
| (FeCoNiMoMn) <sub>3</sub> O <sub>4</sub>                                                                                     | 1.59                                             | 57.2                                | This work                                   |
| (FeCoNiMn) <sub>3</sub> O <sub>4</sub>                                                                                       | 1.59                                             | 74.7                                | This work                                   |
| (FeCoNi) <sub>3</sub> O <sub>4</sub>                                                                                         | 1.62                                             | 83.8                                | This work                                   |
| NiFeXO <sub>4</sub> (X=FeNiAlMoCoC)                                                                                          | 1.43                                             | 53.3                                | ACS Nano, 2023, 17, 1485-1494               |
| AlNiCoRuMo                                                                                                                   | 1.50                                             | 54.5                                | ACS Mater. Lett. 2020, 2, 1698-170          |
| RuNiMoCrFeOx/CNT                                                                                                             | 1.45                                             | 47.0                                | J. Mater. Chem. A, 2022, 10, 21260-21265    |
| FeCoNiB                                                                                                                      | 1.81                                             | 46.0                                | Small, 2019, 15, 1804212                    |
| (MgMnFeCoNi)Sn(OH) <sub>6</sub>                                                                                              | 1.53                                             | 46.8                                | J. Am. Chem. Soc., 2023, 145, 1924-1935     |
| Fe <sub>0.5</sub> CoNiCuZn <sub>0.8</sub>                                                                                    | 1.57                                             | 48.0                                | J. Mater. Sci. Technol., 2021, 93, 110-118  |
| (Cr <sub>0.2</sub> Mn <sub>0.2</sub> Fe <sub>0.2</sub> Co <sub>0.2</sub> Ni <sub>0.2</sub> ) <sub>3</sub> O <sub>4</sub> /GC | 1.55                                             | 54.5                                | Chem. Eng. J., 2022, 431, 133448            |
| CoNiCuMnAl@C/NF                                                                                                              | 1.45                                             | 68.8                                | Chem. Eng. J., 2022, 429, 132410            |
| FeCoNiMnCu/Alloy                                                                                                             | 1.51                                             | 35.6                                | Chem. Eng. J., 2021, 425, 131533            |
| Pt@LDH-4h / CC                                                                                                               | 1.49                                             | 28.4                                | Small, 2023, 19, 2207044.                   |
| Ni-Fe LDH hollow nanoprisms                                                                                                  | 1.51                                             | 49.4                                | Angew. Chem. Int. Ed., 2018, 57, 172-176.   |
| (FeCoNiCrMn) <sub>3</sub> O <sub>4</sub> -400/CP                                                                             | 1.518                                            | 60                                  | Sustain. Energy Fuels, 2022, 6, 1479        |
| CoFeCuMoOOH@Cu/Cu foil                                                                                                       | 1.44                                             | 48.8                                | Adv. Mater., 2021, 22, e2100745             |
| MnFeCoNiCu                                                                                                                   | 1.49                                             | 43.0                                | J. Mater. Chem. A, 2020, 8, 11938-11947     |
| FeCoNiCrMnO/HCS-3                                                                                                            | 1.49                                             | 42.2                                | Colloid Interface Sci., 2024, 653, 179-188. |
| FeCoNiMg-LDH                                                                                                                 | 1.53@100 mA cm <sup>-2</sup>                     | 75.0                                | ACS Catalysis, 2023, 13, 7698-7706.         |

**Table S2.** Comparison of the OER performance with recently reported electrocatalysts in alkaline electrolytes.

| Catalyst                                             | Stability                                      | Mass activity<br>(A g <sup>-1</sup> ) | TOF<br>(s <sup>-1</sup> )     | References                                  |
|------------------------------------------------------|------------------------------------------------|---------------------------------------|-------------------------------|---------------------------------------------|
| <b>(FeCoNiMoRu)<sub>3</sub>O<sub>4</sub></b>         | <b>100 h</b><br><b>@100 mA cm<sup>-2</sup></b> | <b>1281</b><br><b>@320 mV</b>         | <b>0.23</b><br><b>@320 mV</b> | <b>This work</b>                            |
| (FeCoNiCrMn) <sub>3</sub> O <sub>4</sub>             | ---                                            | 112<br>@320 mV                        | 0.011<br>@320 mV              | This work                                   |
| Ni <sub>2</sub> MO <sub>4</sub><br>(M=FeCoCrMn)      | 92 h<br>@10 mA cm <sup>-2</sup>                | 267<br>@400 mV                        | 0.09<br>@400 mV               | J. Colloid Interface Sci., 2023, 646, 89-97 |
| Ho <sub>2</sub> Ru <sub>2</sub> O <sub>7</sub> (HRO) | 10 h<br>@10 mA cm <sup>-2</sup>                | ---                                   | 0.08<br>@300 mV               | J. Mater. Chem. A, 2022, 10, 9419-9426.     |
| HEA-5@Ir                                             | 100 h<br>@10 mA cm <sup>-2</sup>               | 276<br>@300 mV                        | ---                           | SusMat., 2022, 2, 186-196                   |
